# Supplementary material for: Candida glabrata Transcription Factor Rpn4 Mediates Fluconazole Resistance through Regulation of Ergosterol Biosynthesis and Plasma Membrane Permeability
Source: PubMed Central journal article supplement (PMC7449212; doi:10.1128/aac.00554-20), 2020-08-20
Supplement: AAC.00554-20-s0004.pdf [file AAC.00554-20-s0004.pdf]

## **SUPPLEMENTAL MATERIAL**

**Supplemental Figure S1 Growth experiments with relevant cell and fluconazole concentrations**

**Supplemental Table S1 List of differentially expressed genes in WT FLC/WT control samples**

**Supplemental Table S2 List of differentially expressed genes in *Δcgrp4* FLC/WT FLC samples**

**Supplemental Table S3 List of differentially expressed genes in *Δcgrp4* control/WT control samples**

**Supplemental Table S4 List of primers used in this study**

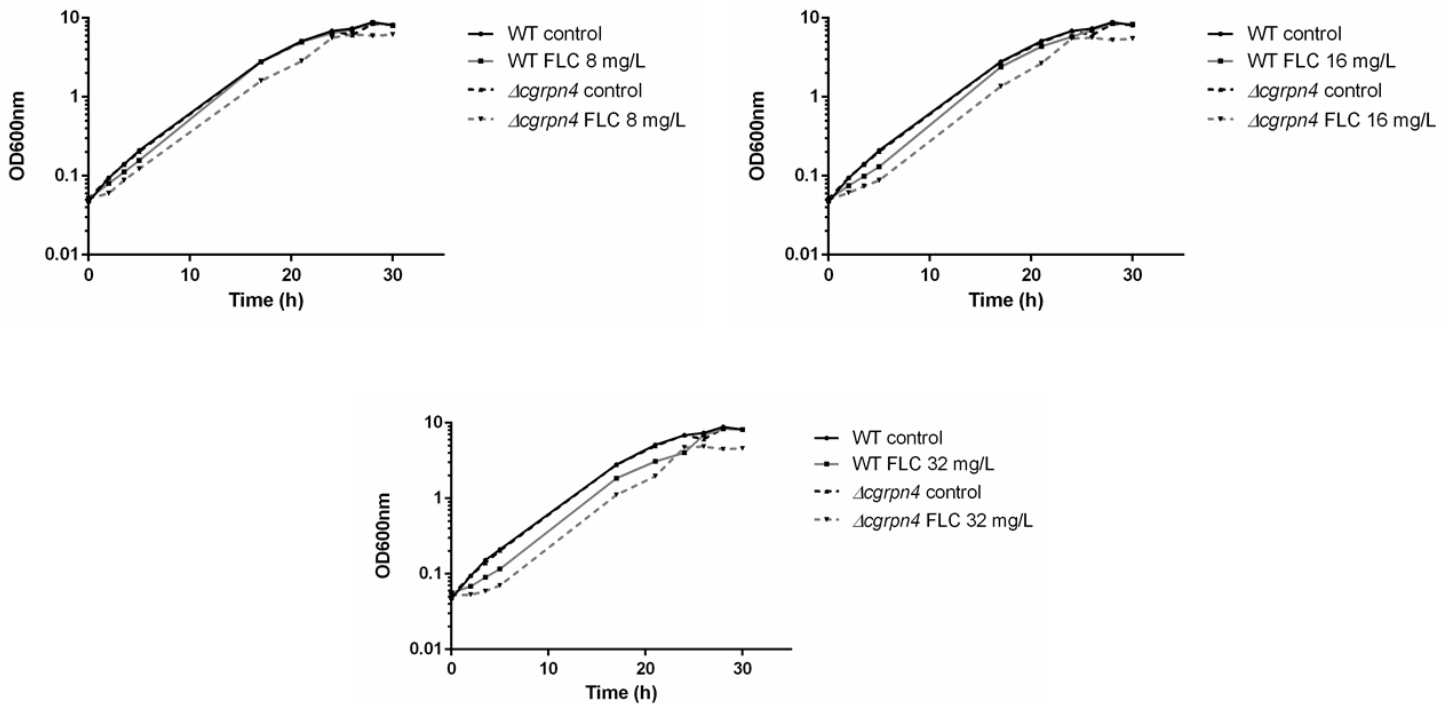

**Figure S1** – *CgRPN4* is required for adaptation to fluconazole stress in *C. glabrata*. Comparison of the susceptibility of KUE100 and KUE100\_  $\Delta cgrpn4$  strains during cultivation in liquid BM in the presence of varying concentrations of fluconazole. Cells were grown to mid-exponential phase in BM and then transferred to fresh medium (control) or to fresh medium containing 8, 16 or 32 mg/L fluconazole (OD600<sub>nm</sub> = 0.05). Growth curves are representative of at least 2 independent experiments.

**Supplemental Table S4 List of primers used in this study**

| Primer Name/Function                             | Primer sequence                                                                                                                                                                        |
|--------------------------------------------------|----------------------------------------------------------------------------------------------------------------------------------------------------------------------------------------|
| <i>CgHIS3</i> replacement cassette               | Fw - 5'-<br>TATATAAAGGAGCACTGGTGGCGGTGGTGGCAATTCTATTA AAACTTTCTCTCGAG<br>GGCCGCTGATCACG-3'<br>Rv - 5'-<br>AAAAAAAATTATAATGATGTATCCGAAATTTTAAAAGAAATTTGAATGATGTTGGC<br>ATCGTGAGGCTGG-3' |
| <i>CgRPN4</i> deletion confirmation              | Fw - 5'-GATTTGGGACTGAAGAGG-3'<br>Rv - 5'-ATAGTCCACATCGTCGTAG-3'<br>Check - 5'-TCCCTTCTGATGTGGTGGC-3'                                                                                   |
| Cloning of <i>CgRPN4</i> in pGREG526/576         | Fw - 5'-<br>GAATTCGATATCAAGCTTATCGATACCGTCGACAATGACGTCTATAGATTTGGGAC-3'<br>Rv - 5'-<br>GCGTGACATAACTAATTACATGACTCGAGGTCGACTTATGCAGTGACAAATCCGATG-<br>3'                                |
| Cloning of <i>MTI</i> promoter in pGREG576       | Fw - 5'-<br>TTAACCTCACTAAAGGGAACAAAAGCTGGAGCTCCTGTACGACACGCATCATGTGG<br>CAATC-3'<br>Rv - 5'-<br>GAAAAGTTCTTCTCTTTACTCATACTAGTGC GGCTGTGTTTGTGTTTGTATGTGTTTG<br>TTG-3'                  |
| Cloning of <i>PDC1</i> promoter in pGREG526      | Fw - 5'-<br>TTAACCTCACTAAAGGGAACAAAAGCTGGAGCTAGCATTTTTATACACGTTTTAC-3'<br>Rv - 5'-<br>ACCGTTAATTAACCGGGGATCATACTAGTGC GGCTGTTAATGTTTTTGGCAATTG-<br>3'                                  |
| Cloning of <i>CgERG11</i> promoter in pYEP354    | Fw - 5'-CCGGAATTCGGTCGACTACTTCAAGGCTA-3'<br>Rv - 5'-AACTGCAGCTTCAGTGGACATGTTATTGT-3'                                                                                                   |
| <i>CgERG11</i> promoter mutagenesis in pYEP354   | Fw - 5'-GAGTGACATCTTTGTTAGCCCTTCCCATC-3'<br>Rv - 5'-GATGGGAAGGGCTAACAAAGATGCTACTC-3'                                                                                                   |
| <i>CgERG11</i> gene expression measurement       | Fw - 5'-GCCATTGGCGCAGAGAGT-3'<br>Rv - 5'-GCCATGTGATGGTGTACACAAAT-3'                                                                                                                    |
| <i>lacZ</i> gene expression measurement          | Fw - 5'-TGGCTGGAGTGCATCTTC-3'<br>Rv - 5'-CGTGCATCTGCCAGTTTGAC-3'                                                                                                                       |
| <i>CgRDN25</i> gene expression measurement       | Fw - 5'-AACAACTACCGGCCGAAT-3'<br>Rv - 5'-CAAGCGTGTTACCTATACTCCGCCGTCA-3'                                                                                                               |
| <i>CgERG11</i> promoter amplification after CHIP | Fw - 5'-CTGCACCAAACGACATGAGA-3'<br>Rv - 5'-GTGCTGAGCAAAGGCCATAA-3'                                                                                                                     |
